# Supplementary material for: Expansion by whole genome duplication and evolution of the sox gene family in teleost fish
Source: PubMed Central journal article supplement (PMC5524304; doi:10.1371/journal.pone.0180936), 2017-07-24

SuppfigureS1

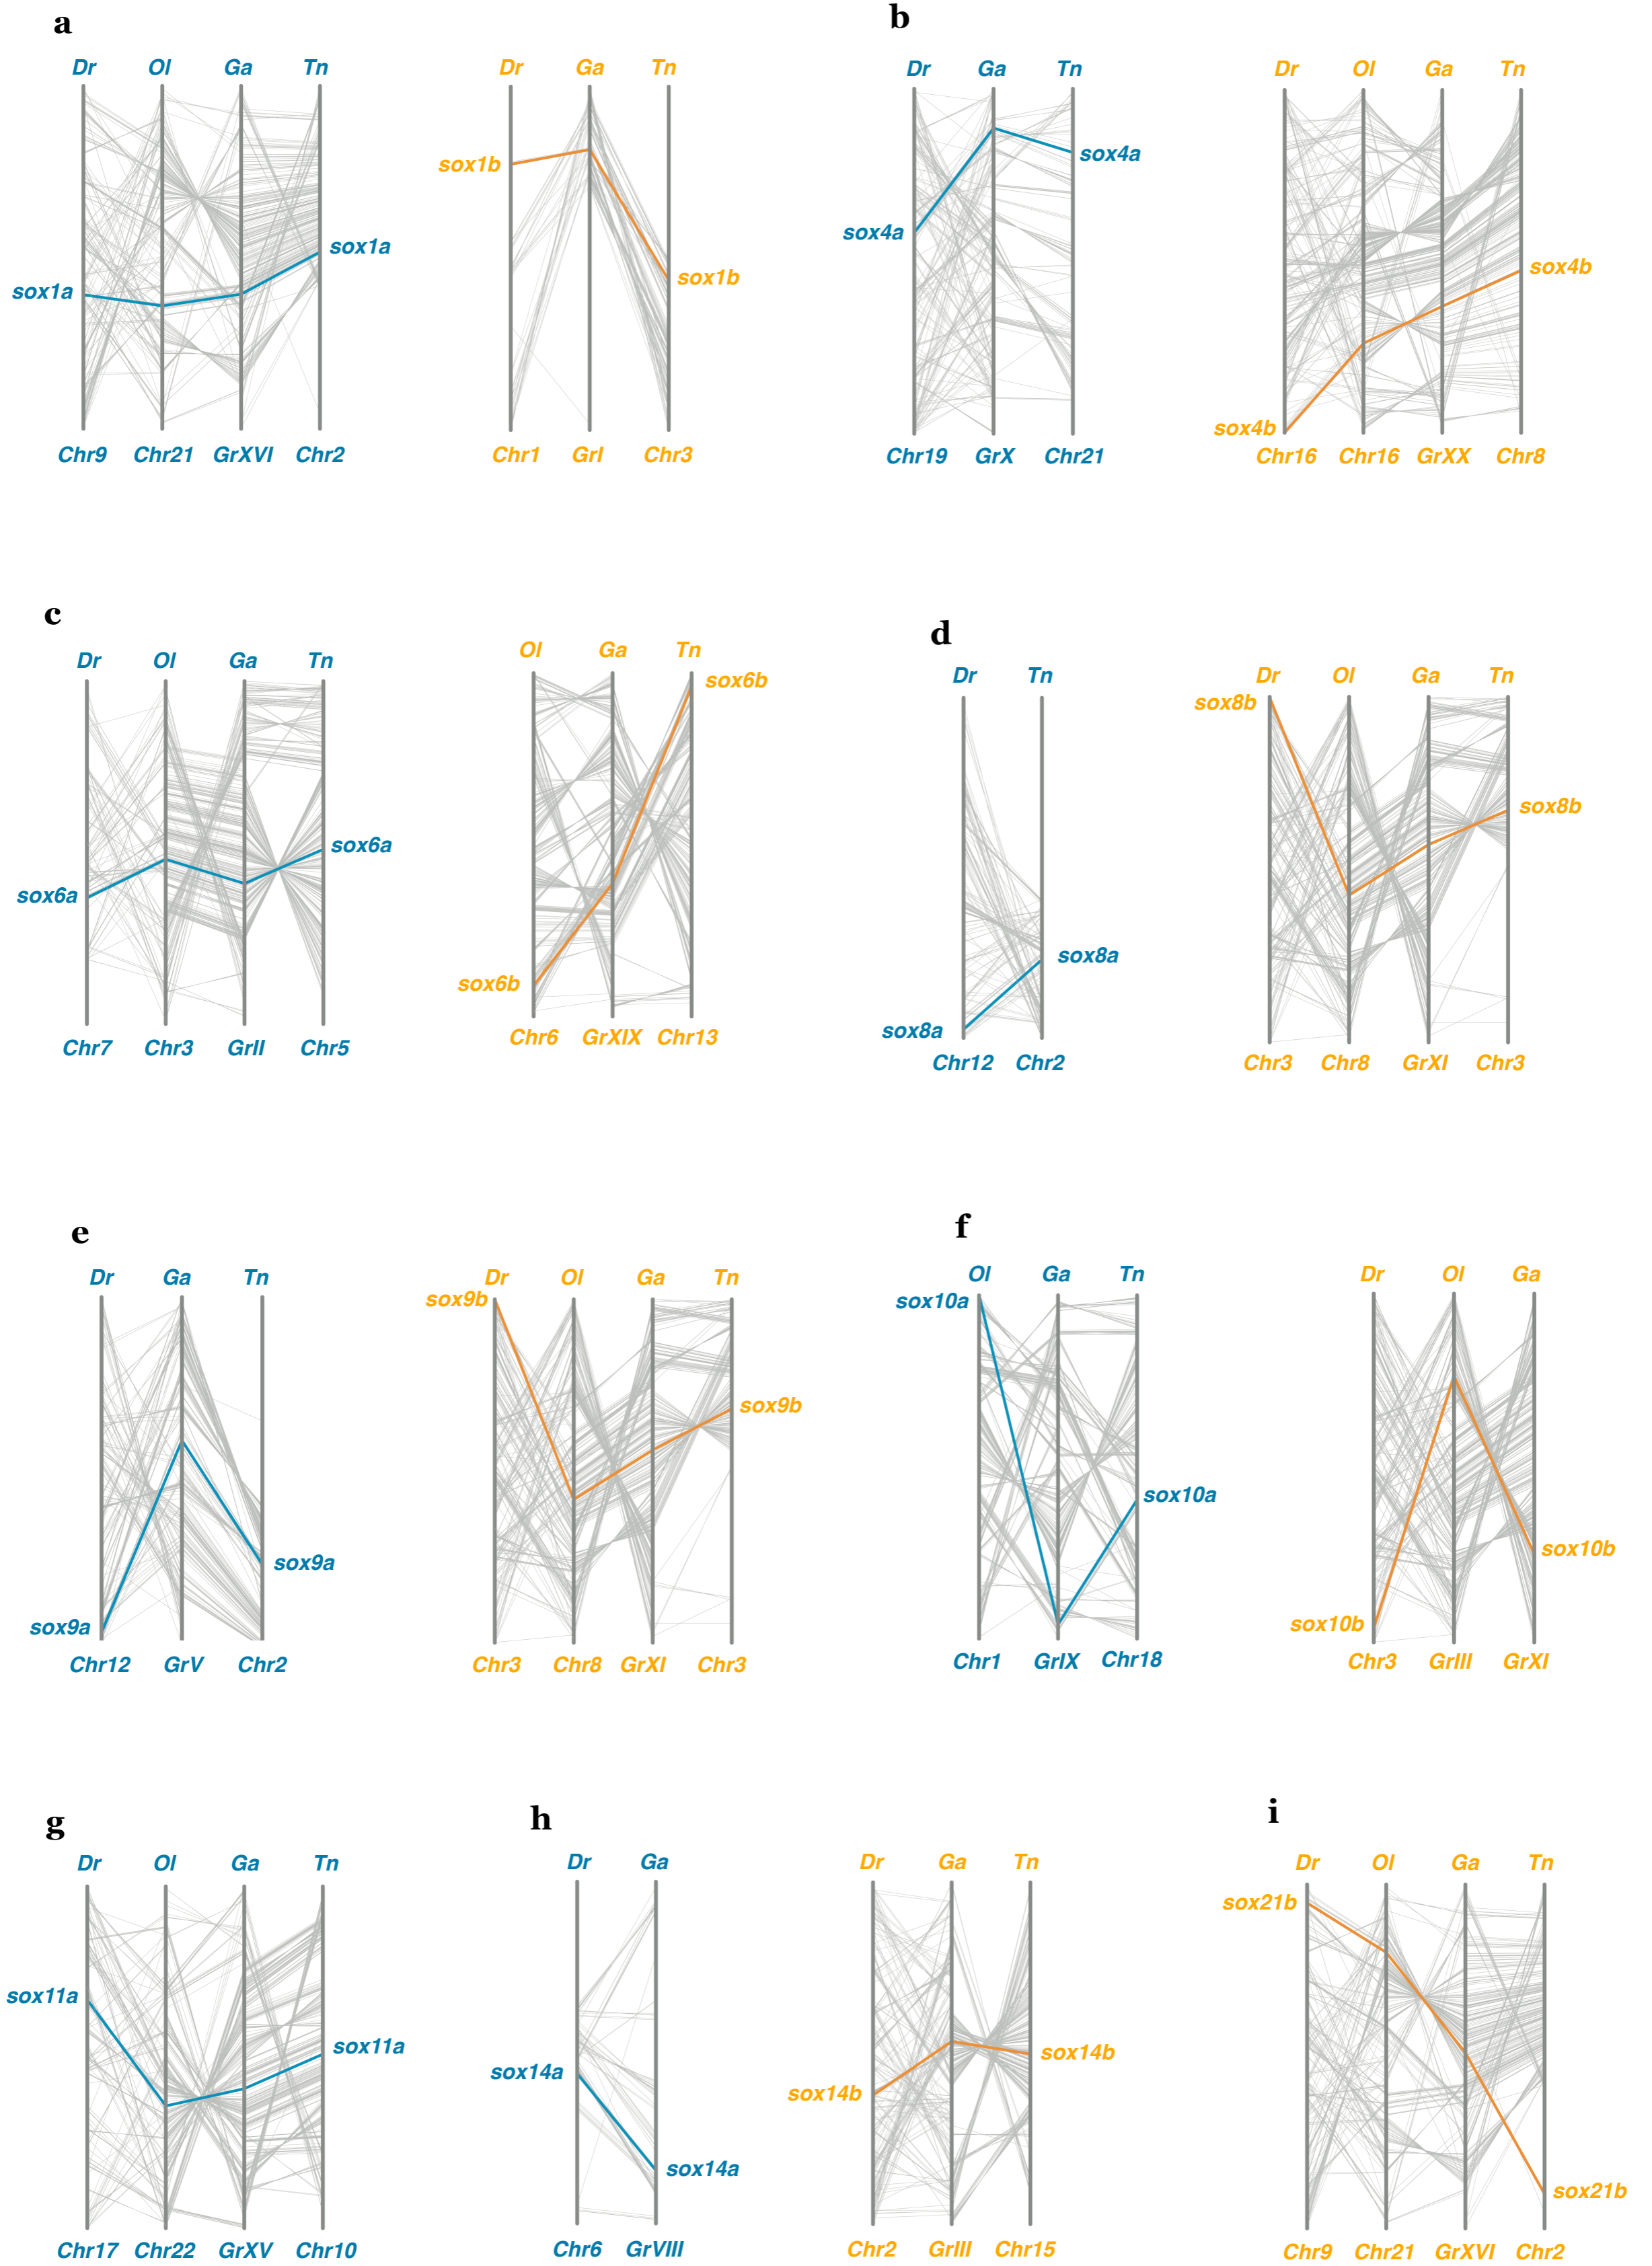

Supplement: pone.0180936.s001.pdf [file pone.0180936.s001.pdf]
