# Supplementary material for: Expansion by whole genome duplication and evolution of the sox gene family in teleost fish
Source: PubMed Central journal article supplement (PMC5524304; doi:10.1371/journal.pone.0180936), 2017-07-24
Supplement: pone.0180936.s005.pdf [file pone.0180936.s005.pdf]

**SuppfigureS5**

|                                             | Sox4                  | Sox11                 | Sox8                  | Sox9                  | Sox10                 |
|---------------------------------------------|-----------------------|-----------------------|-----------------------|-----------------------|-----------------------|
| Means of the number of CNEs for paralogue a | 2.33                  | 31.71                 | 0.17                  | 8.43                  | 0                     |
| Means of the number of CNEs for paralogue b | 6.86                  | 3.00                  | 5.00                  | 25.00                 | 3                     |
| t-test p-value                              | 2,87.10 <sup>-3</sup> | 5.86.10 <sup>-7</sup> | 8,92.10 <sup>-5</sup> | 1,47.10 <sup>-2</sup> | NA<br>(constant data) |
