# Supplementary material for: Expansion by whole genome duplication and evolution of the sox gene family in teleost fish
Source: PLoS One. 2017 Jul 24;12(7):e0180936. doi: 10.1371/journal.pone.0180936 (PMC5524304; doi:10.1371/journal.pone.0180936)
Supplement: S4 Fig — Log likelihood values (LnL) are obtained for each model (A, B or C). Parameters ωr, ωp, ωa and ωb are the dN/dS ratios for all branches, both paralogs branches, paralogs a branches and paralogs b branches, respectively. Tests were done by comparing twice the difference of likelihood values to a X2 distribution with degrees of freedom (df) equal to the difference in number of free parameters of each model. (PDF) [file pone.0180936.s004.pdf]

SuppFigureS4

|   | sox | Model          | LnL (np)  | Estimates of $\omega$ |            |            |            | Tests         | df | p-value |
|---|-----|----------------|-----------|-----------------------|------------|------------|------------|---------------|----|---------|
|   |     |                |           | $\omega^r$            | $\omega^p$ | $\omega^a$ | $\omega^b$ |               |    |         |
| B | 1   | A : One ratio  | -6811.05  | 0.028                 |            |            |            | Model A vs. B | 1  | NS      |
|   |     | B : two ratio  | -6809.73  | 0.022                 | 0.030      |            |            | Model B vs. C | 1  | <0.0001 |
|   |     | C : tree ratio | -6801.21  | 0.022                 |            | 0.020      | 0.042      |               |    |         |
|   | 14  | A : One ratio  | -5843.90  | 0.036                 |            |            |            | Model A vs. B | 1  | <0.0001 |
|   |     | B : two ratio  | -5829.83  | 0.017                 | 0.049      |            |            | Model B vs. C | 1  | <0.0001 |
|   |     | C : tree ratio | -5797.89  | 0.017                 |            | 0.018      | 0.091      |               |    |         |
|   | 21  | A : One ratio  | -5821.282 | 0.02                  |            |            |            | Model A vs. B | 1  | NS      |
|   |     | B : two ratio  | -5819.52  | 0.014                 | 0.023      |            |            | Model B vs. C | 1  | <0.0001 |
|   |     | C : tree ratio | -5811.101 | 0.013                 |            | 0.073      | 0.021      |               |    |         |
| C | 4   | A : One ratio  | -7271.80  | 0.032                 |            |            |            | Model A vs. B | 1  | NS      |
|   |     | B : two ratio  | -7270.88  | 0.028                 | 0.034      |            |            | Model B vs. C | 1  | < 0.05  |
|   |     | C : tree ratio | -7268.92  | 0.029                 |            | 0.040      | 0.029      |               |    |         |
|   | 11  | A : One ratio  | -8648.14  | 0.051                 |            |            |            | Model A vs. B | 1  | < 0.05  |
|   |     | B : two ratio  | -8643.88  | 0.039                 | 0.057      |            |            | Model B vs. C | 1  | <0.0001 |
|   |     | C : tree ratio | -8631.77  | 0.039                 |            | 0.038      | 0.077      |               |    |         |
| D | 6   | A : One ratio  | -7304.04  | 0.047                 |            |            |            | Model A vs. B | 1  | < 0.05  |
|   |     | B : two ratio  | -7301.12  | 0.036                 | 0.053      |            |            | Model B vs. C | 1  | <0.01   |
|   |     | C : tree ratio | -7295.66  | 0.036                 |            | 0.040      | 0.068      |               |    |         |
| E | 8   | A : One ratio  | -8608.62  | 0.044                 |            |            |            | Model A vs. B | 1  | <0.0001 |
|   |     | B : two ratio  | -8594.53  | 0.021                 | 0.056      |            |            | Model B vs. C | 1  | <0.0001 |
|   |     | C : tree ratio | -8552.25  | 0.021                 |            | 0.104      | 0.026      |               |    |         |
|   | 9   | A : One ratio  | -11100.46 | 0.029                 |            |            |            | Model A vs. B | 1  | <0.001  |
|   |     | B : two ratio  | -11094.96 | 0.02                  | 0.032      |            |            | Model B vs. C | 1  | NS      |
|   |     | C : tree ratio | -11095.11 | 0.02                  |            | 0.033      | 0.031      |               |    |         |
|   | 10  | A : One ratio  | -9970.81  | 0.051                 |            |            |            | Model A vs. B | 1  | < 0.05  |
|   |     | B : two ratio  | -9968.2   | 0.04                  | 0.056      |            |            | Model B vs. C | 1  | < 0.05  |
|   |     | C : tree ratio | -9964.26  | 0.04                  |            | 0.044      | 0.066      |               |    |         |
